# Supplementary material for: Autonomous self-optimizing defects by refining energy levels through hydrogenation in CeO2–x polymorphism: a walking mobility of oxygen vacancy with enhanced adsorption capabilities and photocatalytic stability
Source: Royal Society of Chemistry journal article supplement (doi:10.1039/d2nj00057a), 2022-01-01

## Supporting Information

**Autonomous self optimizing defects by refining energy levels through hydrogenation in CeO<sub>2-x</sub> polymorphism: A walking mobility of oxygen vacancy with enhanced adsorption capabilities and photocatalytic stability**

**Ranjana Verma,<sup>†</sup> Jay Singh,<sup>\*‡</sup> Sanjoy Kumar Samdarshi <sup>§</sup> and Anchal Srivastava<sup>\*†</sup>**

<sup>†</sup>*Department of Physics, Institute of Science, Banaras Hindu University, Varanasi, 221005, India*

<sup>‡</sup>*Department of Chemistry, Institute of Science, Banaras Hindu University, Varanasi, 221005, India.*

<sup>§</sup>*Centre for Energy Engineering and Centre of Excellence in Green and Efficient Energy Technology (CoE-GEET), Central University of Jharkhand, Ranchi, Jharkhand, India*

Fig. S1 Comparison between successive Ce 3d XPS spectra of  $\text{CeO}_{2-x}$  and H-  $\text{CeO}_{2-x}$  catalyst

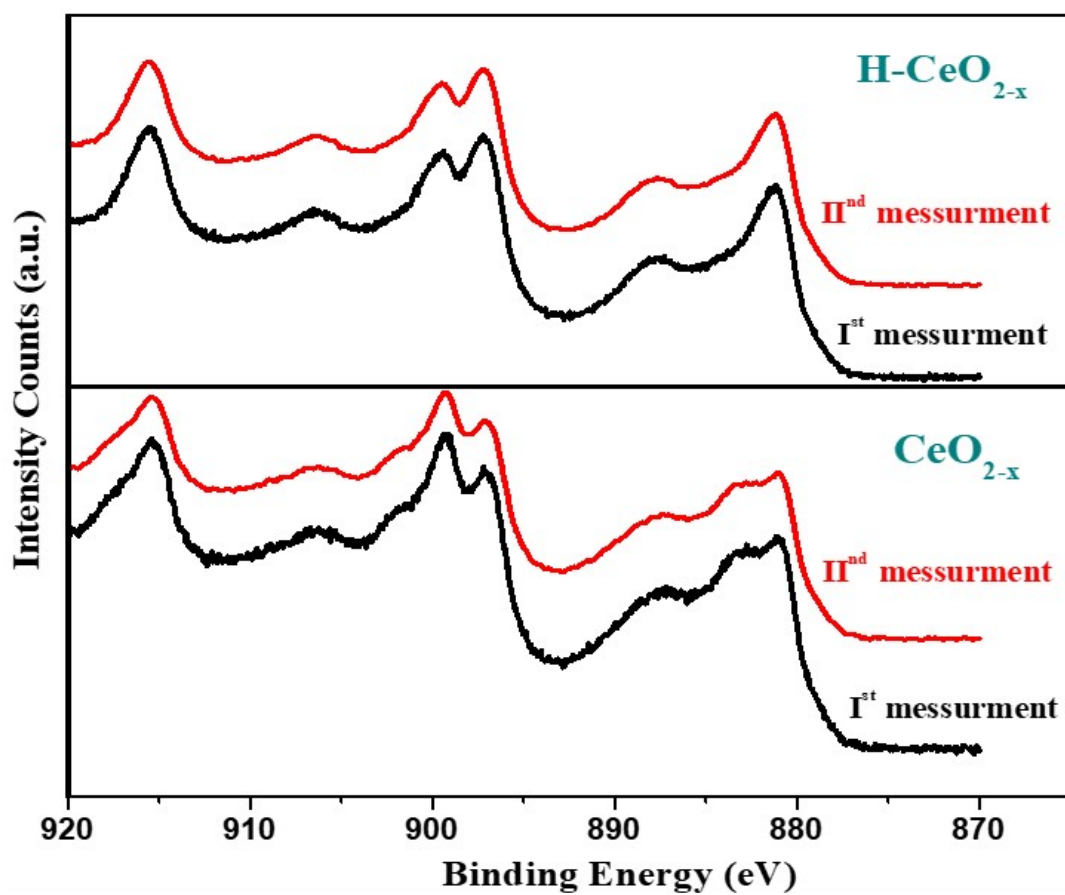

**Fig. S2.** The quantitative concentration as well as ratio of the  $[\text{Ce}^{4+}]/[\text{Ce}^{3+}]$  in  $\text{CeO}_{2-x}$  and H- $\text{CeO}_{2-x}$  catalyst were calculated using Eq. 1. The concentration of  $\text{Ce}^{3+}$  was calculated by taking the ratio of the integrated peak areas corresponding to the  $\text{Ce}^{3+}$  peaks to the total area under the whole  $\text{Ce}3d$ , i.e.  $\text{Ce}^{3+}/(\text{Ce}^{3+} + \text{Ce}^{4+})$  spectrum. The  $\text{Ce}^{3+}$  concentration in  $\text{CeO}_{2-x}$  and H- $\text{CeO}_{2-x}$  samples is calculated using equation Eq. 1.

$$\text{Ce}^{3+} = \frac{A_{vo} + A_{v'} + A_{uo} + A_{u'}}{A_{vo} + A_{v'} + A_{uo} + A_{u'} + A_v + A_{v''} + A_{v'''} + A_u + A_{u''} + A_{v'''}} \quad (1)$$

where  $A$  denotes the area of the corresponding peaks marked as the subscript in the spectrum (Fig 4 (c)). The calculated concentration of  $\text{Ce}^{3+}$  in  $\text{CeO}_{2-x}$  and H- $\text{CeO}_{2-x}$  is  $\sim 44.6\%$  and  $\sim 36.3\%$ . Thus, after hydrogenation, the concentration of  $\text{Ce}^{3+}$  decreases suggesting the conversion of some  $\text{Ce}^{3+}$  to  $\text{Ce}^{4+}$  by converting the highly disordered  $\text{CeO}_{2-x}$  close to more perfect optimized  $\text{CeO}_2$  catalyst. It corroborates the XRD results as well. The  $\text{Ce}^{3+}$  may either be distributed in regions of  $\text{Ce}_2\text{O}_3$  or around O vacancies in  $\text{CeO}_2$ . The  $\text{Ce}^{4+}/\text{Ce}^{3+}$  ratio in the  $\text{CeO}_{2-x}$  and H- $\text{CeO}_{2-x}$  samples was calculated from the deconvoluted peak area [Fig. (d)]. The decrease in  $\text{Ce}^{3+}$  concentration caused by hydrogenation may be either due to the reduction of defects, oxygen vacancy or may be  $\text{Ce}_2\text{O}_3$  phase convert to more stable  $\text{CeO}_2$  phase. To further support our results, the total oxygen content in  $\text{CeO}_{2-x}$  and H- $\text{CeO}_{2-x}$  sample is calculated to examine whether the  $\text{Ce}^{3+}$  has the form  $\text{Ce}_2\text{O}_3$  or is due to O vacancies. The total oxygen content is the sum of the O required to fully oxidize into  $\text{Ce}^{4+}$  or to  $\text{Ce}^{3+}$  and to form  $\text{CeO}_2$  and  $\text{Ce}_2\text{O}_3$ , respectively.

The stoichiometry  $X = [\text{O}]/[\text{Ce}]$  is equal to 2 for perfect  $\text{CeO}_2$  lattice structure and 1.5 for  $\text{Ce}_2\text{O}_3$ , the ratio of the required oxygen to fully oxidize  $\text{Ce}^{4+}$  and  $\text{Ce}^{3+}$  to the sum  $[\text{Ce}^{4+}] + [\text{Ce}^{3+}]$  is determined from the concentrations  $\text{Ce}^{4+}$  and  $\text{Ce}^{3+}$  using Eq 2 and are summarized in Table 1

$$X = \frac{[\text{O}]}{[\text{Ce}]} = 3/2 \times [\text{Ce}^{3+}] + 2 \times [\text{Ce}^{4+}].$$

The actual stoichiometry  $X' = [O]/[Ce]$  can be calculated directly from the integrated areas of XPS peaks for the  $O1s$  and  $Ce3d$  according to the equation (3)

$$X' = \frac{O1s}{Ce3d} = \frac{A_O}{A_{Ce}} \cdot \frac{S_O}{S_{Ce}} \quad \text{----- (Eq. 3)} \quad (3)$$

where  $A_O$  and  $A_{Ce}$  are the integrated areas of the  $O1s$  and  $Ce3d$  XPS peaks, and  $S_{Ce}$  (=7.393) and  $S_O$  (=0.711) are sensitivity factors of Ce and O atoms respectively. [15, 29].

**Table S1:** Concentrations of  $Ce^{4+}$  and  $Ce^{3+}$  ions, stoichiometry  $x = [O]/[Ce]$  and  $x' = [O1s]/[Ce3d]$  of the  $CeO_{2-x}$  and H-  $CeO_{2-x}$  catalyst

| Sample         | $Ce^{4+}$ | $Ce^{3+}$ | $[Ce^{4+}]/[Ce^{3+}]$ | X=           | X'=              |
|----------------|-----------|-----------|-----------------------|--------------|------------------|
|                |           |           |                       | $[O]/[Ce]^a$ | $[O1s]/[Ce3d]^b$ |
| $CeO_{2-x}$    | 0.6373    | 0.2901    | 2.196                 | 1.927        | 2.215            |
| H- $CeO_{2-x}$ | 0.7170    | 0.2421    | 2.961                 | 1.812        | 1.982            |

(where “a” means using the intensities of the  $O1s$  and  $Ce3d$  XPS peaks and “b” means using the deconvolution of the  $Ce3d$  XPS peak).

XPS study confirmed the coexistence of both  $Ce^{4+}$  and  $Ce^{3+}$  in the samples. This result indicates that H- $CeO_{2-x}$  samples having less concentration of  $Ce^{3+}$  caused by oxidation by converting  $Ce^{3+}$  to  $Ce^{4+}$  in which the most prominent  $Ce^{4+}$  content is forming  $CeO_2$ . On the other hand, It is further seen that there is oxygen deficiency w.r.t the required O needed to fully oxidize Ce in  $CeO_{2-x}$  with high  $Ce^{3+}$  content, suggesting that  $Ce_2O_3$  and O vacancies coexist. However, the maximum oxygen deficiency is ~11% ( $CeO_{2-x}$ ) and ~4% (H- $CeO_{2-x}$ ) thus the majority ~89% of  $Ce^{3+}$  is consumed in  $Ce_2O_3$  phase in case of  $CeO_{2-x}$ .

Fig. S3 ). Bar plot showing the remaining concentration of MO solution until the equilibrium of MO over the catalyst under dark

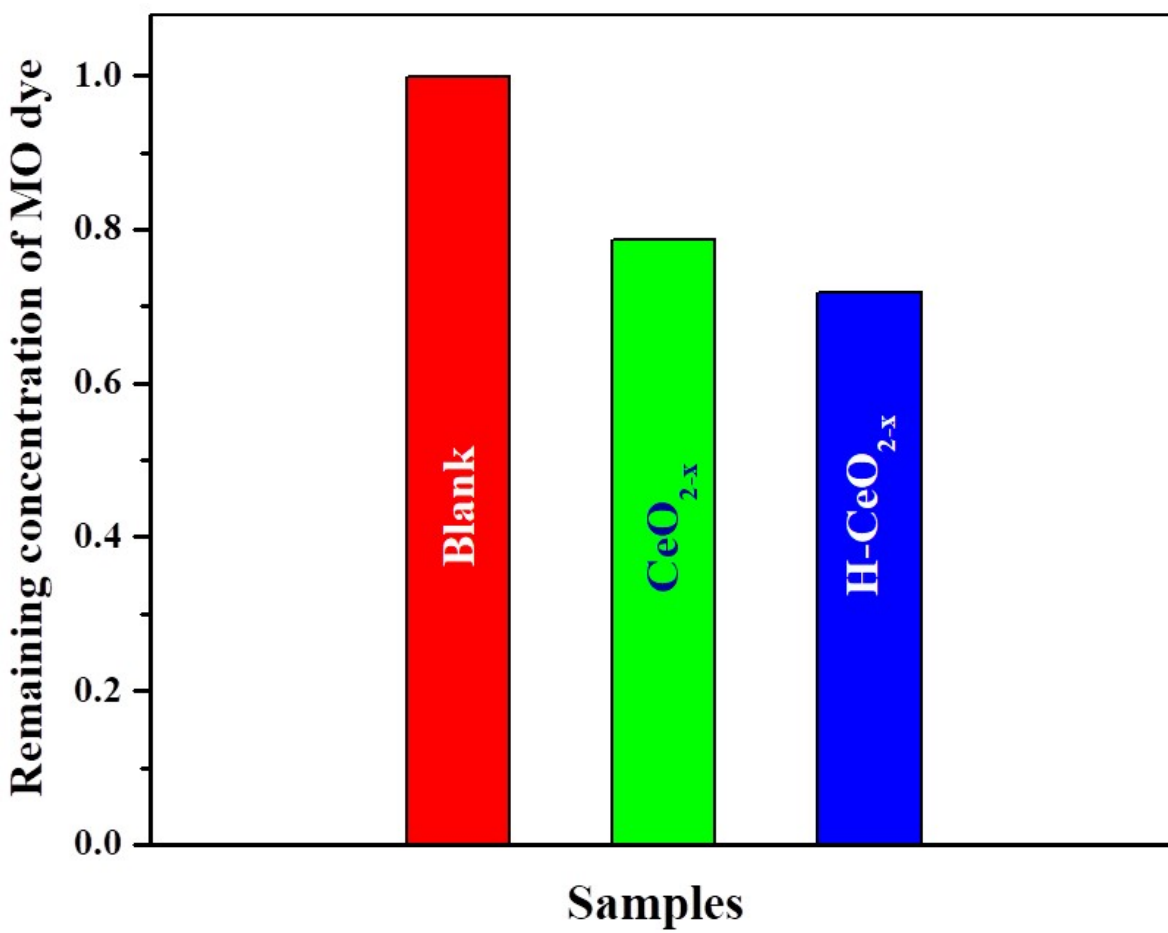

Supplement: d2nj00057a1.pdf [file d2nj00057a1.pdf]
